# Supplementary material for: The loss of the ‘pelvic step’ in human evolution
Source: Oxford University Press journal article supplement (doi:10.1242/jeb.240440), 2021-08-15
Supplement: jeb240440supp.pdf [file jeb240440supp.pdf]

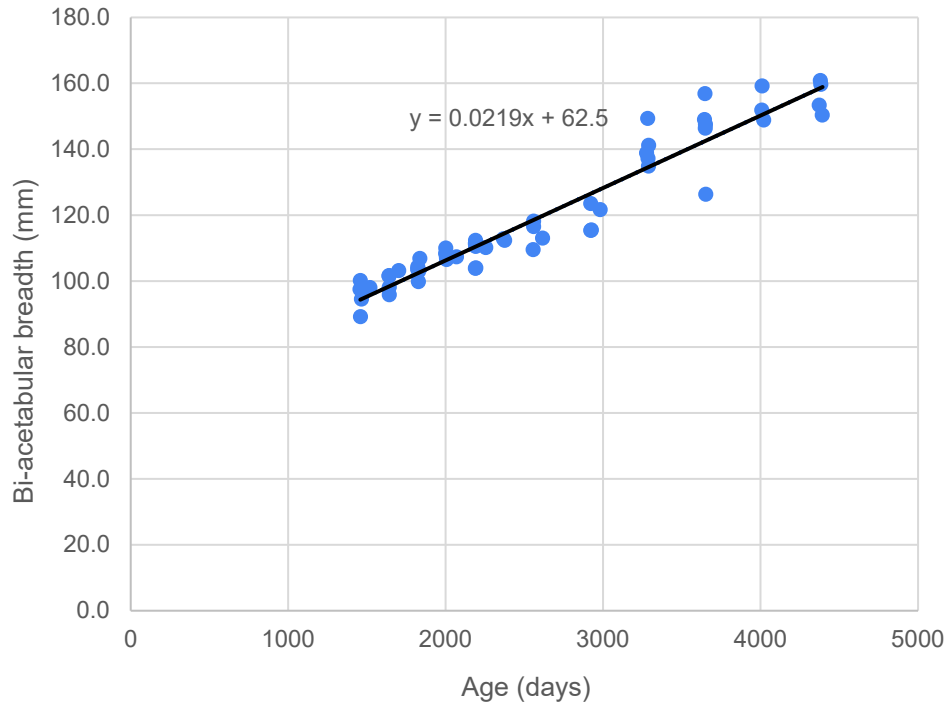

**Fig. S1.** Chimpanzee bi-acetabular breadth growth curve. Data are derived from an x-ray dataset of nine, laboratory-reared chimpanzees in a historical radiological study (see Thompson et al., 2020 for more details). Raw data shown in Table S2. Due to unequal and small sample sizes, simple linear regression was used to calculate a single growth rate (0.0219 mm/day). This growth rate generally led to only small increases to measured bi-acetabular size (1.1–3.2%).

## Supplementary Materials & Methods

**Script 1.** Linear mixed model code and results for differences in dimensionless stride length versus dimensionless speed between sexes within humans.

The following is the summary of a model (m103.2.2) which incorporates only the human data, with sex as fixed effect and subject as a random effect (light blue and purple curves of Figure 2a).

```
summary(m103.2.2)

## Linear mixed model fit by REML ['lmerMod']
## Formula: DimensionlessStrideLength ~ DimSpeed + I(DimSpeed^2) + Sex +
##   (DimSpeed | Subject)
## Data: rotation_data[which(rotation_data$Species == "Human"), ]
## Control: lmerControl(optimizer = "bobyqa", optCtrl = list(maxfun = 1e+05))
##
## REML criterion at convergence: -2805.8
##
## Scaled residuals:
##   Min       1Q   Median       3Q      Max
## -3.7322 -0.5911  0.0159  0.6299  3.6588
##
## Random effects:
##   Groups   Name                Variance Std.Dev. Corr
##   Subject  (Intercept)  0.011810 0.10867
##           DimSpeed    0.050467 0.22465 -0.88
##   Residual                    0.002321 0.04817
## Number of obs: 900, groups: Subject, 10
##
## Fixed effects:
##              Estimate Std. Error t value
## (Intercept)    0.76744    0.03907  19.645
## DimSpeed       1.80666    0.08974  20.133
## I(DimSpeed^2) -0.44727    0.07478  -5.981
## SexM           0.10458    0.03272   3.196
##
## Correlation of Fixed Effects:
##              (Intr) DimSpd I(DS^2)
## DimSpeed    -0.744
## I(DimSpd^2)  0.198 -0.600
## SexM        -0.418 -0.004  0.008
```

This model (m103.2.2) was tested against a null model, which is identical to m103.2.2, except without the including sex as an effect (m103.2.2\_n). This null model resulting in a slightly lower, but nearly equivalent, AIC score. However, an ANOVA between the models shows that the model including sex significantly outperforms the model which does not include sex ( $p = 0.008543$ ).

```
AIC(m103.2.2, m103.2.2_n)

##           df       AIC
## m103.2.2    8 -2789.781
## m103.2.2_n  7 -2790.619

anova(m103.2.2, m103.2.2_n)
```

```
## refitting model(s) with ML (instead of REML)
## Data: rotation_data[which(rotation_data$Species == "Human"), ]
## Models:
## m103.2.2_n: DimensionlessStrideLength ~ DimSpeed + I(DimSpeed^2) + (DimSpeed |
## m103.2.2_n: Subject)
## m103.2.2: DimensionlessStrideLength ~ DimSpeed + I(DimSpeed^2) + Sex +
## m103.2.2: (DimSpeed | Subject)
##          npar      AIC      BIC logLik deviance Chisq Df Pr(>Chisq)
## m103.2.2_n    7 -2803.3 -2769.7 1408.7 -2817.3
## m103.2.2     8 -2808.2 -2769.8 1412.1 -2824.2 6.916  1  0.008543 **
## ---
## Signif. codes:  0 '***' 0.001 '**' 0.01 '*' 0.05 '.' 0.1 ' ' 1
```

## Script 2. Linear mixed model code and results for differences in dimensionless stride length versus dimensionless speed between chimpanzees and humans

The following is the summary of a model (m103.2.2\_s) which incorporates both human and chimpanzee data with species and subject as a random effects (red and blue curves of Figure 2a).

```
summary(m103.2.2_s)

## Linear mixed model fit by REML ['lmerMod']
## Formula: DimensionlessStrideLength ~ DimSpeed + I(DimSpeed^2) + (DimSpeed |
##   Species) + (DimSpeed | Subject)
## Data: chimp_human_data
## Control: lmerControl(optimizer = "bobyqa", optCtrl = list(maxfun = 1e+05))
##
## REML criterion at convergence: -2771.4
##
## Scaled residuals:
##   Min       1Q   Median       3Q      Max
## -3.5491 -0.5790  0.0091  0.6226  6.7741
##
## Random effects:
##   Groups   Name                Variance Std.Dev. Corr
##   Subject  (Intercept)  0.009083  0.09530
##           DimSpeed    0.049044  0.22146 -0.73
##   Species  (Intercept)  0.023830  0.15437
##           DimSpeed    0.916419  0.95730 -1.00
## Residual                    0.002585  0.05085
## Number of obs: 923, groups: Subject, 12; Species, 2
##
## Fixed effects:
##              Estimate Std. Error t value
## (Intercept)    0.71183    0.11457  6.213
## DimSpeed       2.47903    0.68669  3.610
## I(DimSpeed^2) -0.44616    0.07879 -5.663
##
## Correlation of Fixed Effects:
##              (Intr) DimSpd
## DimSpeed    -0.980
## I(DimSpd^2)  0.076 -0.084
## convergence code: 0
## boundary (singular) fit: see ?isSingular
```

This model (m103.2.2\_s) was tested against a null model, which is identical to m103.2.2\_s, except without including species as an effect (m103.2.2\_s\_n). The model including species resulted in a lower AIC score, and significantly outperformed the null model ( $p=0.002123$ ).

```
AIC(m103.2.2_s,m103.2.2_s_n)

##           df       AIC
## m103.2.2_s  10 -2751.398
## m103.2.2_s_n  7 -2740.052

anova(m103.2.2_s,m103.2.2_s_n)

## refitting model(s) with ML (instead of REML)
```

```
## Data: chimp_human_data
## Models:
## m103.2.2_s_n: DimensionlessStrideLength ~ DimSpeed + I(DimSpeed^2) + (DimSpeed |
## m103.2.2_s_n:      Subject)
## m103.2.2_s: DimensionlessStrideLength ~ DimSpeed + I(DimSpeed^2) + (DimSpeed |
## m103.2.2_s:      Species) + (DimSpeed | Subject)
##          npar      AIC      BIC logLik deviance  Chisq Df Pr(>Chisq)
## m103.2.2_s_n    7 -2751.1 -2717.3 1382.5  -2765.1
## m103.2.2_s     10 -2759.7 -2711.4 1389.9  -2779.7 14.668  3  0.002123 **
## ---
## Signif. codes:  0 '***' 0.001 '**' 0.01 '*' 0.05 '.' 0.1 ' ' 1
```

### Script 3. Linear mixed model code and results for differences in pelvic rotation range of motion versus dimensionless speed between chimpanzees and humans

The following is the summary of a model (m102.2.2\_s) which incorporates both human and chimpanzee data with species and subject as a random effects (red and blue curves of Figure 2b).

```
summary(m102.2.2_s)

## Linear mixed model fit by REML ['lmerMod']
## Formula: PelvicRotationROM ~ DimSpeed + I(DimSpeed^2) + (DimSpeed | Species) +
##   (DimSpeed | Subject)
## Data: chimp_human_data
## Control: lmerControl(optimizer = "bobyqa", optCtrl = list(maxfun = 1e+06))
##
## REML criterion at convergence: 4324.2
##
## Scaled residuals:
##   Min       1Q   Median       3Q      Max
## -4.1086 -0.6621 -0.0276  0.5836  3.7481
##
## Random effects:
##   Groups   Name                Variance Std.Dev. Corr
##   Subject  (Intercept)           36.650   6.054
##           DimSpeed           294.823  17.170  -0.79
##   Species  (Intercept)           0.000   0.000
##           DimSpeed           2166.785  46.549   NaN
## Residual                    5.693   2.386
## Number of obs: 923, groups: Subject, 12; Species, 2
##
## Fixed effects:
##              Estimate Std. Error t value
## (Intercept)    16.129     1.917    8.414
## DimSpeed       -23.747    33.532   -0.708
## I(DimSpeed^2)   96.726     3.699   26.150
##
## Correlation of Fixed Effects:
##              (Intr) DimSpd
## DimSpeed    -0.137
## I(DimSpd^2)  0.215 -0.080
## convergence code: 0
## boundary (singular) fit: see ?isSingular
```

This model (m102.2.2\_s) was tested against a null model, which is identical to m102.2.2\_s, except without including species as an effect (m102.2.2\_s\_n). The model including species resulted in a lower AIC score, and significantly outperformed the null model ( $p=0.008494$ ).

```
AIC(m102.2.2_s,m102.2.2_s_n)

##           df      AIC
## m102.2.2_s  10 4344.196
## m102.2.2_s_n  7 4352.280

anova(m102.2.2_s,m102.2.2_s_n)

## refitting model(s) with ML (instead of REML)
```

```
## Data: chimp_human_data
## Models:
## m102.2.2_s_n: PelvicRotationROM ~ DimSpeed + I(DimSpeed^2) + (DimSpeed | Subject)
## m102.2.2_s: PelvicRotationROM ~ DimSpeed + I(DimSpeed^2) + (DimSpeed | Species) +
## m102.2.2_s: (DimSpeed | Subject)
##          npar    AIC    BIC logLik deviance Chisq Df Pr(>Chisq)
## m102.2.2_s_n    7 4365.8 4399.6 -2175.9  4351.8
## m102.2.2_s     10 4360.1 4408.4 -2170.1  4340.1 11.698  3  0.008494 **
## ---
## Signif. codes:  0 '***' 0.001 '**' 0.01 '*' 0.05 '.' 0.1 ' ' 1
```

#### Script 4. Linear mixed model code and results for differences in pelvic step contribution versus dimensionless speed between chimpanzees and humans

The following is the summary of a model (m101.2.2\_s) which incorporates both human and chimpanzee data with species and subject as a random effects (red and blue curves of Figure 2c).

```
summary(m101.2.2_s)

## Linear mixed model fit by REML ['lmerMod']
## Formula: PelvicRot_Percent ~ DimSpeed + I(DimSpeed^2) + (DimSpeed | Species) +
##   (DimSpeed | Subject)
## Data: chimp_human_data
## Control: lmerControl(optimizer = "bobyqa", optCtrl = list(maxfun = 1e+05))
##
## REML criterion at convergence: 1809.4
##
## Scaled residuals:
##   Min       1Q   Median       3Q      Max
## -5.1282 -0.5017 -0.0008  0.5364  3.3686
##
## Random effects:
##   Groups   Name                Variance Std.Dev. Corr
##   Subject  (Intercept)           1.2800   1.1314
##           DimSpeed           18.7460   4.3297  -0.92
##   Species  (Intercept)           0.9943   0.9971
##           DimSpeed           98.2706   9.9132   1.00
##   Residual                    0.3757   0.6130
## Number of obs: 923, groups: Subject, 12; Species, 2
##
## Fixed effects:
##              Estimate Std. Error t value
## (Intercept)   -0.6557    0.8059  -0.814
## DimSpeed       14.5722    7.1617   2.035
## I(DimSpeed^2)  -1.8063    0.9501  -1.901
##
## Correlation of Fixed Effects:
##              (Intr) DimSpd
## DimSpeed      0.781
## I(DimSpd^2)   0.132 -0.094
```

This model (m101.2.2\_s) was tested against a null model, which is identical to m101.2.2\_s, except without including species as an effect (m101.2.2\_s\_n). The model including species resulted in a lower AIC score, and significantly outperformed the null model ( $p=0.0002871$ ).

```
AIC(m101.2.2_s,m101.2.2_s_n)

##           df       AIC
## m101.2.2_s  10 1829.398
## m101.2.2_s_n  7 1845.696

anova(m101.2.2_s,m101.2.2_s_n)

## refitting model(s) with ML (instead of REML)
```



```
## Data: chimp_human_data
## Models:
## m101.2.2_s_n: PelvicRot_Percent ~ DimSpeed + I(DimSpeed^2) + (DimSpeed | Subject)
## m101.2.2_s: PelvicRot_Percent ~ DimSpeed + I(DimSpeed^2) + (DimSpeed | Species) +
## m101.2.2_s:      (DimSpeed | Subject)
##          npar    AIC    BIC logLik deviance Chisq Df Pr(>Chisq)
## m101.2.2_s_n    7 1849.6 1883.4 -917.80  1835.6
## m101.2.2_s     10 1836.7 1885.0 -908.35  1816.7 18.898  3 0.0002871 ***
## ---
## Signif. codes:  0 '***' 0.001 '**' 0.01 '*' 0.05 '.' 0.1 ' ' 1
```

**Table S1.** Subject anthropometrics

|                                | Subject         | Sex  | Height (mm) | Weight (kg) | Age (y) | Effective lower limb length (mm) | Bi-acetabular breadth (mm) |
|--------------------------------|-----------------|------|-------------|-------------|---------|----------------------------------|----------------------------|
| <b>Humans</b>                  | 1               | F    | 1575        | 59.7        | 26.6    | 860                              | 143                        |
|                                | 2               | M    | 1710        | 72.1        | 23.7    | 909                              | 164                        |
|                                | 3               | M    | 1780        | 74.1        | 24.6    | 916                              | 146                        |
|                                | 4               | M    | 1820        | 83.0        | 24.2    | 970                              | 167                        |
|                                | 5               | M    | 1800        | 74.4        | 24.8    | 990                              | 153                        |
|                                | 6               | F    | 1462        | 42.6        | 24.3    | 800                              | 146                        |
|                                | 7               | F    | 1600        | 50.5        | 23.8    | 835                              | 115                        |
|                                | 8               | F    | 1640        | 66.0        | 25.5    | 910                              | 179                        |
|                                | 9               | F    | 1652        | 52.6        | 25.9    | 903                              | 172                        |
|                                | 10              | M    | 1915        | 96.2        | 24.7    | 1019                             | 155                        |
|                                | male mean       | -    | 1805        | 79.9        | 24.4    | 961                              | 157                        |
|                                | male st. dev.   | -    | 74          | 10.0        | 0.5     | 47                               | 8                          |
|                                | female mean     | -    | 1586        | 54.3        | 25.2    | 862                              | 151                        |
|                                | female st. dev. | -    | 76          | 8.9         | 1.2     | 46                               | 26                         |
| total mean                     | -               | 1695 | 67.1        | 24.8        | 911     | 154                              |                            |
| total st. dev.                 | -               | 135  | 16.2        | 0.9         | 68      | 18                               |                            |
| <b>Chimpanzees<sup>a</sup></b> | 1 mean          | M    | 1032        | 35.7        | 7.0     | 441                              | 129                        |
|                                | 1 st. dev.      | -    | 3           | 0.8         | 0.1     | 9                                | 1                          |
|                                | 2 mean          | M    | 1016        | 33.9        | 7.1     | 418                              | 127                        |
|                                | 2 st. dev.      | -    | 5           | 1.0         | 0.1     | 13                               | 1                          |
|                                | total mean      | -    | 1023        | 34.8        | 7.1     | 429                              | 128                        |
|                                | total st. dev.  | -    | 9           | 1.2         | 0.1     | 16                               | 1                          |

Abbreviations: st. dev., standard deviation. <sup>a</sup>Chimpanzee means and standard deviations are based on multiple experimental days.

**Table S2.** Growth curve data on chimpanzee bi-acetabular breadth

| Subject | Sex | Morphosource subject ID | Subject ID | Image #   | Age (days) | Bi-acetabular breadth (mm) |
|---------|-----|-------------------------|------------|-----------|------------|----------------------------|
| Ken     | M   | YLPB-55                 | 55-19      | 549       | 2003       | 110.0                      |
| Ken     | M   | YLPB-55                 | 55-24      | 784       | 3278       | 138.8                      |
| Ken     | M   | YLPB-55                 | 55-25      | 145       | 3646       | 149.0                      |
| Ken     | M   | YLPB-55                 | 55-26      | 429       | 4009       | 151.8                      |
| Ken     | M   | YLPB-55                 | 55-27      | 690       | 4374       | 153.3                      |
| Art     | M   | YLPB-57                 | 57-16      | 715       | 1521       | 98.0                       |
| Art     | M   | YLPB-57                 | 57-17      | 52        | 1704       | 103.2                      |
| Art     | M   | YLPB-57                 | 57-19      | 575       | 2071       | 107.3                      |
| Art     | M   | YLPB-57                 | 57-21      | 66        | 2617       | 113.0                      |
| Art     | M   | YLPB-57                 | 57-22      | 470       | 2983       | 121.7                      |
| Alf     | M   | YLPB-59                 | 59-21      | 852       | 2192       | 112.3                      |
| Alf     | M   | YLPB-59                 | 59-22      | 186       | 2560       | 118.2                      |
| Alf     | M   | YLPB-59                 | 59-24      | 848       | 3291       | 141.2                      |
| Alf     | M   | YLPB-59                 | 59-25      | 204       | 3651       | 146.3                      |
| Alf     | M   | YLPB-59                 | 59-26      | 479       | 4022       | 148.8                      |
| Bard    | M   | YLPB-61                 | 61-21      | 129       | 1460       | 100.2                      |
| Bard    | M   | YLPB-61                 | 61-22      | 390       | 1642       | 101.5                      |
| Bard    | M   | YLPB-61                 | 61-23      | 631       | 1825       | 104.3                      |
| Bard    | M   | YLPB-61                 | 61-24      | 820       | 2007       | 107.2                      |
| Bard    | M   | YLPB-61                 | 61-25      | 941       | 2194       | 111.5                      |
| Bard    | M   | YLPB-61                 | 61-26      | 124       | 2376       | 112.3                      |
| Bard    | M   | YLPB-61                 | 61-27      | 335       | 2560       | 116.5                      |
| Bard    | M   | YLPB-61                 | 61-28      | 646       | 2923       | 123.5                      |
| Bard    | M   | YLPB-61                 | 61-29      | 2         | 3287       | 137.2                      |
| Bard    | M   | YLPB-61                 | 61-30      | 269       | 3652       | 147.5                      |
| Scarf   | M   | YLPB-65                 | 65-30      | 871       | 1826       | 103.7                      |
| Scarf   | M   | YLPB-65                 | 65-32      | 240       | 2193       | 110.5                      |
| Jed     | M   | YLPB-67                 | 67-29      | 690 & 687 | 1461       | 89.2                       |
| Jed     | M   | YLPB-67                 | 67-30      | 846 & 848 | 1644       | 95.8                       |
| Jed     | M   | YLPB-67                 | 67-31      | 2         | 1829       | 99.8                       |
| Jed     | M   | YLPB-67                 | 67-32      | 390       | 2191       | 103.8                      |
| Jed     | M   | YLPB-67                 | 67-33      | 694       | 2557       | 109.5                      |
| Jed     | M   | YLPB-67                 | 67-34      | 61 & 53   | 2927       | 115.5                      |
| Jed     | M   | YLPB-67                 | 67-36      | 634       | 3654       | 126.3                      |
| Web     | M   | YLPB-79                 | 79-23      | 464       | 1644       | 98.2                       |
| Web     | M   | YLPB-79                 | 79-25      | 953 & 959 | 2194       | 104.0                      |
| Web     | M   | YLPB-79                 | 79-26      | 239       | 2257       | 110.2                      |
| Web     | M   | YLPB-79                 | 79-27      | 548       | 2923       | 115.3                      |
| Banka   | F   | YLPB-98                 | 79-29      | 533       | 1467       | 94.5                       |

|       |   |         |       |         |      |       |
|-------|---|---------|-------|---------|------|-------|
| Banka | F | YLPB-98 | 79-30 | 893     | 1831 | 103.0 |
| Banka | F | YLPB-98 | 79-31 | 44 & 51 | 2008 | 106.5 |
| Banka | F | YLPB-98 | 79-32 | 270     | 2196 | 111.2 |
| Banka | F | YLPB-98 | 79-35 | 227     | 3290 | 134.8 |
| Banka | F | YLPB-98 | 79-38 | 31      | 4394 | 150.3 |
| Jenny | F | YLPB-90 | 90-22 | 141     | 1458 | 97.5  |
| Jenny | F | YLPB-90 | 90-23 | 420     | 1643 | 101.7 |
| Jenny | F | YLPB-90 | 90-24 | 636     | 1825 | 103.5 |
| Jenny | F | YLPB-90 | 90-25 | 827     | 2001 | 108.3 |
| Jenny | F | YLPB-90 | 90-26 | 949     | 2191 | 111.3 |
| Jenny | F | YLPB-90 | 90-27 | 113     | 2368 | 112.8 |
| Jenny | F | YLPB-90 | 90-30 | 13      | 3285 | 149.3 |
| Jenny | F | YLPB-90 | 90-31 | 2868    | 3649 | 156.8 |
| Jenny | F | YLPB-90 | 90-32 | 591     | 4011 | 159.2 |
| Jenny | F | YLPB-90 | 90-33 | 843     | 4381 | 160.8 |
| Jojo  | F | YLPB-94 | 94-26 | 716     | 1838 | 106.8 |
| Jojo  | F | YLPB-94 | 94-27 | 7       | 2192 | 111.7 |
| Jojo  | F | YLPB-94 | 94-32 | 888     | 4384 | 159.7 |

Bi-acetabular breadth was measured in nine, laboratory-reared chimpanzees in a historical radiological study (see Thompson et al., 2020 for more details). Measurements were taken on all x-ray images where it was possible to visualize the center of the femoral head bilaterally. Subject ID's are as in Thompson et al. (2020). Bi-acetabular breadth is the average of three measurements.

**Table S3.** Application of growth curve data to measured chimpanzee bi-acetabular breadths

| Chimpanzee | Image date | Experimental date | Days past imaging date | Expected additional growth (mm) | Original bi-acetabular measurement (mm) | Corrected bi-acetabular measurement (mm) | Increase (%) |
|------------|------------|-------------------|------------------------|---------------------------------|-----------------------------------------|------------------------------------------|--------------|
| Subject 1  | 6/11/2013  | 8/13/2013         | 63                     | 1.38                            | 125.2                                   | 126.6                                    | 1.1          |
| Subject 1  | 6/11/2013  | 9/4/2013          | 85                     | 1.86                            | 125.2                                   | 127.1                                    | 1.5          |
| Subject 1  | 6/11/2013  | 11/21/2013        | 163                    | 3.57                            | 125.2                                   | 128.8                                    | 2.9          |
| Subject 1  | 6/11/2013  | 11/21/2013        | 163                    | 3.57                            | 125.2                                   | 128.8                                    | 2.9          |
| Subject 1  | 6/11/2013  | 11/21/2013        | 163                    | 3.57                            | 125.2                                   | 128.8                                    | 2.9          |
| Subject 1  | 6/11/2013  | 12/12/2013        | 184                    | 4.03                            | 125.2                                   | 129.2                                    | 3.2          |
| Subject 1  | 6/11/2013  | 12/12/2013        | 184                    | 4.03                            | 125.2                                   | 129.2                                    | 3.2          |
| Subject 1  | 6/11/2013  | 12/12/2013        | 184                    | 4.03                            | 125.2                                   | 129.2                                    | 3.2          |
| Subject 1  | 6/11/2013  | 12/12/2013        | 184                    | 4.03                            | 125.2                                   | 129.2                                    | 3.2          |
| Subject 1  | 6/11/2013  | 12/12/2013        | 184                    | 4.03                            | 125.2                                   | 129.2                                    | 3.2          |
| Subject 1  | 6/11/2013  | 12/12/2013        | 184                    | 4.03                            | 125.2                                   | 129.2                                    | 3.2          |
| Subject 1  | 6/11/2013  | 12/12/2013        | 184                    | 4.03                            | 125.2                                   | 129.2                                    | 3.2          |
| Subject 2  | 6/6/2013   | 8/26/2013         | 81                     | 1.77                            | 124.8                                   | 126.6                                    | 1.4          |
| Subject 2  | 6/6/2013   | 8/26/2013         | 81                     | 1.77                            | 124.8                                   | 126.6                                    | 1.4          |
| Subject 2  | 6/6/2013   | 8/26/2013         | 81                     | 1.77                            | 124.8                                   | 126.6                                    | 1.4          |
| Subject 2  | 6/6/2013   | 8/26/2013         | 81                     | 1.77                            | 124.8                                   | 126.6                                    | 1.4          |
| Subject 2  | 6/6/2013   | 8/26/2013         | 81                     | 1.77                            | 124.8                                   | 126.6                                    | 1.4          |
| Subject 2  | 6/6/2013   | 8/29/2013         | 84                     | 1.84                            | 124.8                                   | 126.6                                    | 1.4          |
| Subject 2  | 6/6/2013   | 8/29/2013         | 84                     | 1.84                            | 124.8                                   | 126.6                                    | 1.4          |
| Subject 2  | 6/6/2013   | 10/31/2013        | 148                    | 3.24                            | 124.8                                   | 126.6                                    | 1.5          |
| Subject 2  | 6/6/2013   | 10/31/2013        | 148                    | 3.24                            | 124.8                                   | 126.6                                    | 1.5          |
| Subject 2  | 6/6/2013   | 10/31/2013        | 148                    | 3.24                            | 124.8                                   | 128.0                                    | 2.6          |
| Subject 2  | 6/6/2013   | 10/31/2013        | 148                    | 3.24                            | 124.8                                   | 128.0                                    | 2.6          |
| Subject 2  | 6/6/2013   | 10/31/2013        | 148                    | 3.24                            | 124.8                                   | 128.0                                    | 2.6          |

The expected growth increases to bi-acetabular breadth are based on the growth rate (0.0219 mm/day, Fig. S1) measured herein and the number which passed between the previous measurement of the chimpanzees in this study.
